# Supplementary material
Source: PubMed Central journal article supplement (PMC7779489)
Supplement: rspb20202723supp1.pdf [file rspb20202723supp1.pdf]

## Supplemental Information

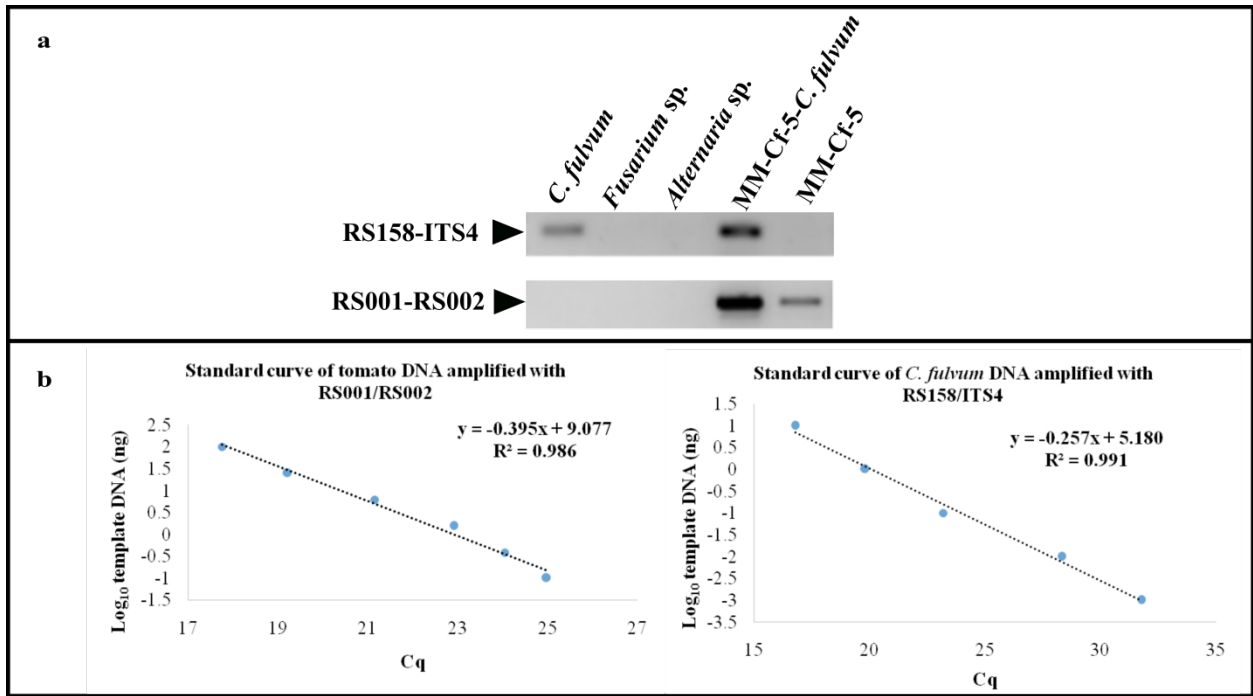

Figure S1: a) Primer pair specificity of RS158-ITS4 used to amplify the *C. fulvum* ITS region and specificity of primer pair RS001-RS002 used to amplify the alpha-tubulin fragment, b) regression line obtained upon plotting of the log<sub>10</sub> values against the ITS and alpha-tubulin Cq values of serial-diluted *C. fulvum* (right) and tomato (left) DNA. The plotted Cq value represents the average of two technical replicates.

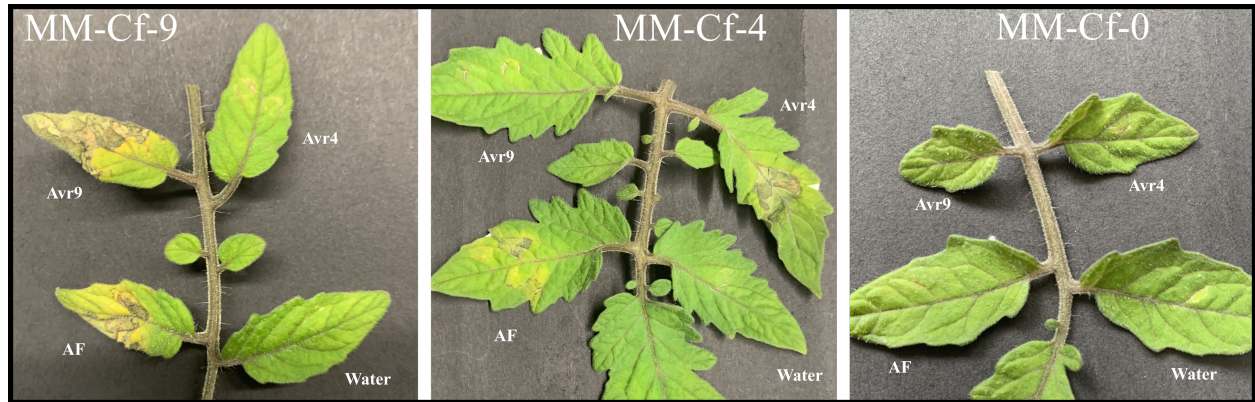

Figure S2: MM-Cf-9, MM-Cf-4 and MM-Cf-0 response 7 days post infiltration with Avr9, Avr4, apoplastic washing fluid contains multiple Avrs secreted by *C. fulvum* race 5 (AF) and water.

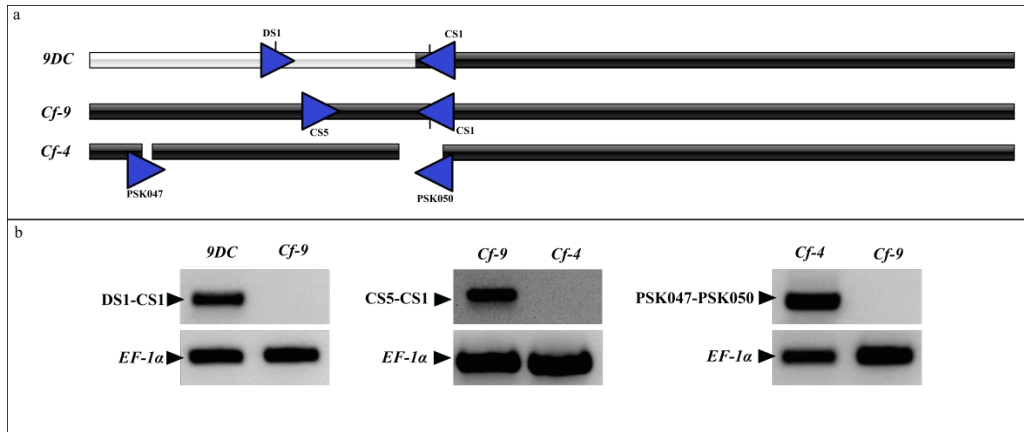

Figure S3: a) *9DC*, *Cf-9* and *Cf-4* alignments and primer annealing sites (blue triangles) (adapted from van der Hoorn *et al.*, 2001), b) PCR amplification products run on agarose gel, obtained by PCR with the different primer pairs indicated in (a), on genomic DNA obtained from LP12 (carrying *9DC*) and the introgression lines *Cf-9* and *Cf-4* used to evaluate the specificity of the primer pairs. The lower panel shows the PCR controls amplifying *elongation factor 1 alpha* (*EF-1α*) (RS003/RS004).

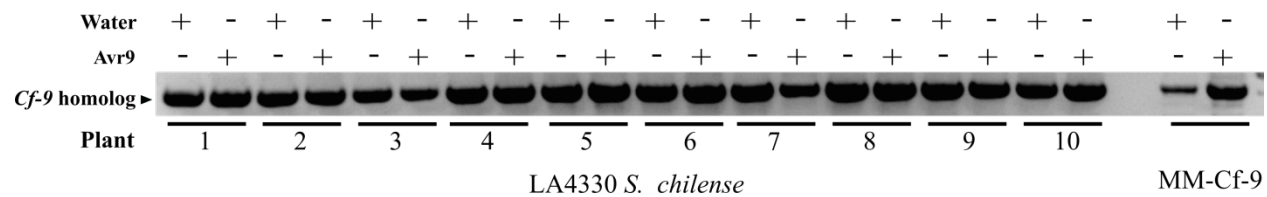

Figure S4: Semi quantitative RT-PCR of cDNA originating from a *Cf-9* homolog, amplified with primer pair PSK009-PSK010 (Table S5) of 10 individuals from population LA4330 and the *Cf-9* introgression line as a positive control, eight hours post infiltration with water or Avr9.

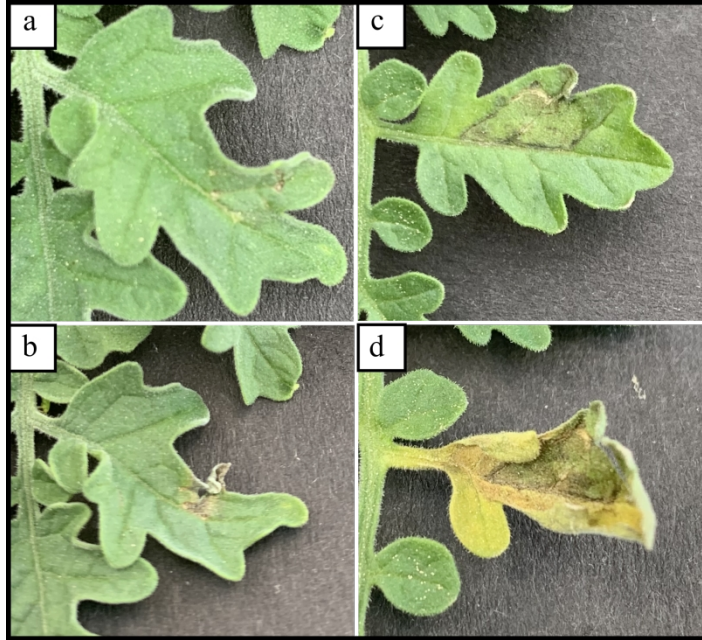

Figure S5: The response to Avr9 is dependent on the age of leaf that is infiltrated. a) and b); young, first fully developed leaf infiltrated with Avr9, showing no HR at four days post infiltration (a) and HR appears when observed at day 7 (b); c) and d); an older leaf of the same plant shows HR within four days post infiltration with Avr9, in the same experiment.

Table S1: AF recognition in different populations of *S. chilense*.

| Population | Region       | plants upon infiltration of AF |                | Total plants tested |
|------------|--------------|--------------------------------|----------------|---------------------|
|            |              | HR observed                    | No HR observed |                     |
| LA3784     | North        | 6                              | 2              | 8                   |
| LA3786     | North        | 8                              | 2              | 10                  |
| LA1958     | Center       | 4                              | 5              | 9                   |
| LA1963     | Center       | 5                              | 4              | 9                   |
| LA2746     | Center       | 10                             | 4              | 14                  |
| LA2747     | Center       | 10                             | 0              | 10                  |
| LA2759     | Center       | 1                              | 9              | 10                  |
| LA2931     | Center       | 6                              | 4              | 10                  |
| LA3111     | Center       | 15                             | 2              | 17                  |
| LA2750     | S. coast     | 0                              | 9              | 9                   |
| LA2932     | S. coast     | 0                              | 10             | 10                  |
| LA4107     | S. coast     | 0                              | 10             | 10                  |
| LA4117A    | S. mountains | 0                              | 9              | 9                   |
| LA4118     | S. mountains | 0                              | 12             | 12                  |
| LA4330     | S. mountains | 0                              | 8              | 8                   |

Table S2: Avr4 and Avr9 recognition in different populations of *S. chilense*

| Population | Region | Number of plants showing HR upon infiltration of |           |                    | Total plants tested |
|------------|--------|--------------------------------------------------|-----------|--------------------|---------------------|
|            |        | Avr9 only                                        | Avr4 only | Both Avr9 and Avr4 |                     |
| LA3784     | North  | 2                                                | 0         | 1                  | 8                   |
| LA3786     | North  | 1                                                | 2         | 1                  | 10                  |
| LA1958     | Center | 1                                                | 1         | 2                  | 9                   |
| LA1963     | Center | 3                                                | 1         | 1                  | 9                   |
| LA2746     | Center | 10                                               | 0         | 0                  | 14                  |
| LA2747     | Center | 7                                                | 0         | 1                  | 10                  |
| LA2759     | Center | 0                                                | 0         | 1                  | 10                  |
| LA2931     | Center | 2                                                | 2         | 1                  | 10                  |
| LA3111     | Center | 9                                                | 1         | 2                  | 17                  |

Table S3: Presence of canonical region of *Cf-9* and *Cf-4* in different populations of *S. chilense*

| Population | Region       | canonical region present of |             | Plants with Avr4 and Avr9 response and presence of <i>Cf-9</i> and <i>Cf-4</i> canonical region | Total plants tested |
|------------|--------------|-----------------------------|-------------|-------------------------------------------------------------------------------------------------|---------------------|
|            |              | <i>Cf-9</i>                 | <i>Cf-4</i> |                                                                                                 |                     |
| LA1958     | Center       | 9                           | 2           | 1                                                                                               | 9                   |
| LA1963     | Center       | 9                           | 6           | 1                                                                                               | 9                   |
| LA2747     | Center       | 9                           | 3           |                                                                                                 | 9                   |
| LA2931     | Center       | 9                           | 3           | 1                                                                                               | 9                   |
| LA3111     | Center       | 9                           | 0           |                                                                                                 | 9                   |
| LA2932     | S. coast     | 9                           | 0           |                                                                                                 | 9                   |
| LA4107     | S. coast     | 9                           | 0           |                                                                                                 | 9                   |
| LA4117A    | S. mountains | 9                           | 0           |                                                                                                 | 9                   |
| LA4330     | S. mountains | 9                           | 0           |                                                                                                 | 9                   |



Table S4: Known co-receptors and adaptors of Cf proteins and their annotation in *S. lycopersicum* and *S. chilense*.

| Gene Name     | <i>S. lycopersicum</i> | <i>S. chilense</i>    |
|---------------|------------------------|-----------------------|
| <i>SOBIR1</i> | <i>Solyc06g071810</i>  | <i>SOLCI002627000</i> |
| <i>SERK3a</i> | <i>Solyc10g047140</i>  | <i>SOLCI001000400</i> |
| <i>ACIK1</i>  | <i>Solyc07g041940</i>  | <i>SOLCI000527600</i> |
| <i>BIR2</i>   | <i>Solyc02g087460</i>  | <i>SOLCI003763100</i> |
| <i>BIR2b</i>  | <i>Solyc02g067560</i>  | <i>SOLCI005193700</i> |

Table S5: Sequences of the primers used for qPCR and PCR in this study.

| Sr.No | Name                  | Sequences ('5-NNNN-3')      |
|-------|-----------------------|-----------------------------|
| qPCR  |                       |                             |
| 1.    | RS001_Tubulin_Forward | GCCTACCATGAGCAGCTTTC        |
| 2.    | RS002_Tubulin_Reverse | CAATGCGTGAGAAGACCTCA        |
| 3.    | RS158-ITS-Forward     | GTCTCCGGCTGAGCAGTT          |
| 4.    | ITS4-ITS-Reverse      | TCCTCCGCTTATTGATATGC        |
| PCR   |                       |                             |
| 5.    | RS003-EF1A_-Forward   | GTCCCCATCTCTGGTTTTGA        |
| 6.    | RS004-EF1A-Reverse    | GGGTCATCTTTGGAGTTGGA        |
| 7.    | DS1-9DC-Forward       | GAGAGCTCAACCTTTACGAA        |
| 8.    | CS5-Cf-9-Forward      | TTTCCAACCTTACAATCCCTTC      |
| 9.    | CS1-Cf-9-9DC-Reverse  | GCCGTTCAAGTTGGGTGTT         |
| 10.   | PSK009-Cf-Forward     | ATGGATTGTGTAAAACCTTGTATTCCT |
| 11.   | PSK010-Cf-Reverse     | CTAATATCTTTTCTTGTGCTTTTTCA  |
| 12.   | PSK047-Cf-4-Forward   | ACGACAGAAGAAGCTC            |
| 13.   | PSK050-Cf-4-Reverse   | GATGGAATTGGTCCTT            |
